# Supplementary material for: Rubisco activities, properties, and regulation in three different C4 grasses under drought
Source: PubMed Central journal article supplement — J Exp Bot. 2010 Apr 2;61(9):2355–66. doi: 10.1093/jxb/erq071 (PMC2877893; doi:10.1093/jxb/erq071), 2010-04-02
Supplement: erq071_1.pdf [file erq071_1.pdf]

**Rubisco activities, properties and regulation in three different C<sub>4</sub> grasses under drought.** A. Elizabete Carmo-Silva, Alfred J. Keys, P. John Andralojc, Stephen J. Powers, M. Celeste Arrabaça, Martin A. J. Parry

**Supplementary Data (Figure S1)**

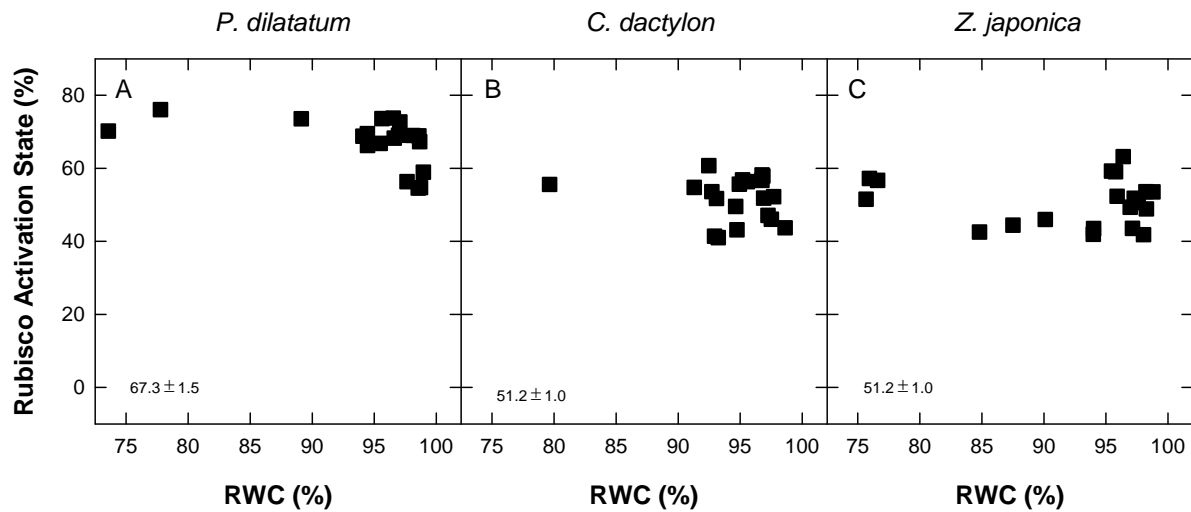

**Figure S1.** Rubisco activation state (calculated as initial activity / total activity × 100) as a function of the relative water content (RWC) in the leaves of *Paspalum dilatatum* (A), *Cynodon dactylon* (B) and *Zoysia japonica* (C). There was no significant regression on RWC (F-test,  $P > 0.05$ ). Mean values ± standard errors are given.
